# Supplementary material for: A feed-forward loop between lncARSR and YAP activity promotes expansion of renal tumour-initiating cells
Source: PubMed Central journal article supplement (PMC5133634; doi:10.1038/ncomms12692), 2016-11-25
Supplement: ncomms12692-s1.pdf [file ncomms12692-s1.pdf]

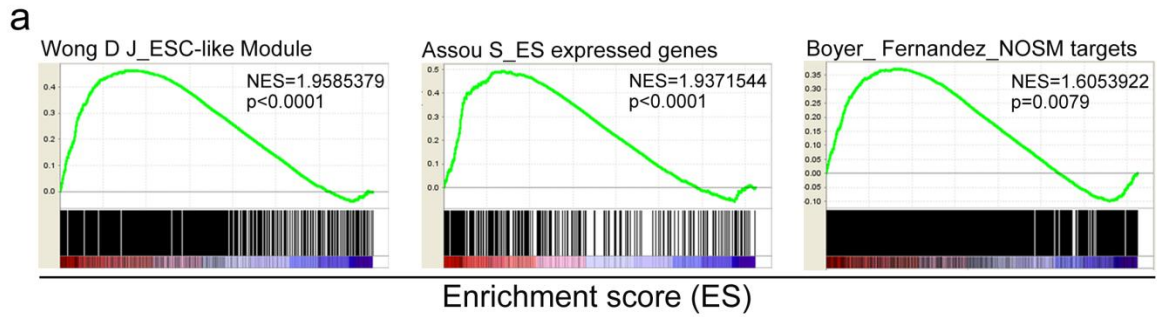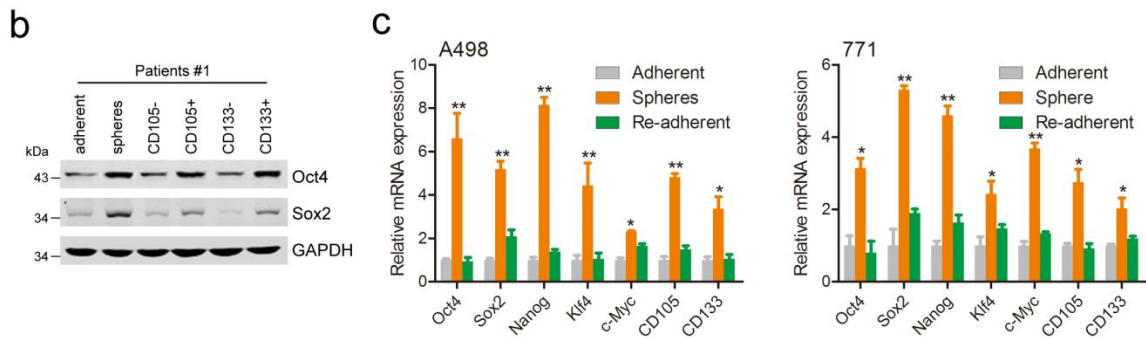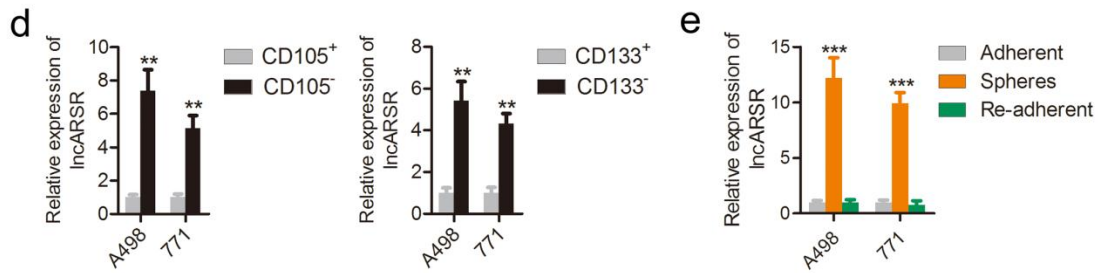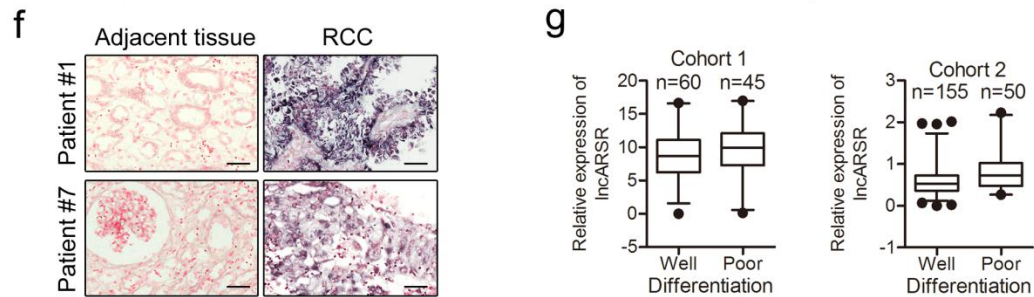

**Supplementary Figure 1. lncARSR is upregulated in T-ICs and predicts poor prognosis**

(a) Gene set enrichment analysis using three stem cell-like gene signatures. NES, normalized enrichment score. (b) Western blot analysis of indicated proteins in enriched T-ICs from primary RCC cells. (c) qRT-PCR analysis of indicated mRNAs in RCC adherent, spheres and re-adherent cells ( $n = 3$ ). (d) qRT-PCR analysis of lncARSR in MACS sorted CD105<sup>+</sup> (left) or CD133<sup>+</sup> (right) RCC cells relative to negative cells ( $n = 3$ ). (e) qRT-PCR analysis of lncARSR in RCC adherent, spheres and re-adherent cells ( $n = 3$ ). (c-e) Data are represented as mean  $\pm$  s.d.; \* $p < 0.05$ , \*\* $p < 0.01$  and \*\*\* $p < 0.001$ ; two-tailed Student's  $t$ -test. (f) Representative images of lncARSR expression detected by RNA ISH (in situ hybridization) in cohort 2. Scale bar = 50  $\mu$ m. (g) Comparison of lncARSR levels in well or poorly differentiated RCC tissues in cohorts 1 (left,  $p = 0.013$ , Mann-Whitney  $U$ -test) and cohort 2 (right,  $p < 0.001$ , Mann-Whitney  $U$ -test). The horizontal lines in the box plots represent the median, the boxes represent the interquartile range, and the whiskers represent the 2.5th and 97.5th percentiles.

**a**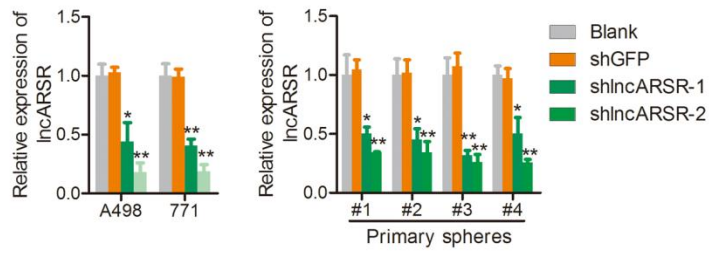**b**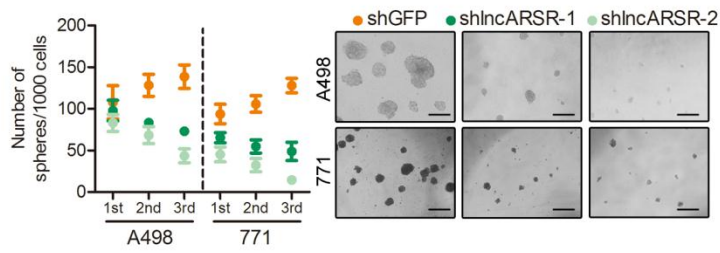**c**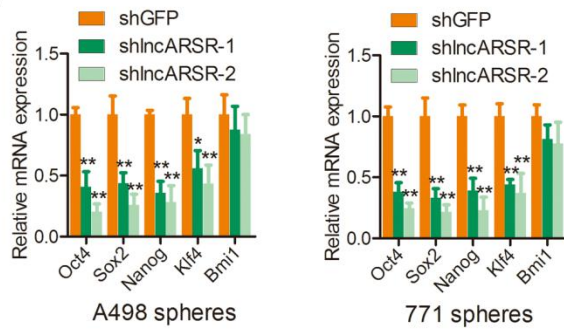**d**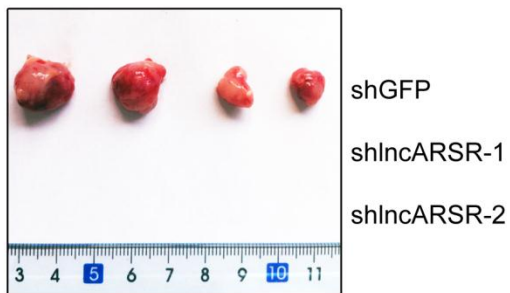

**Supplementary Figure 2. lncARSR is required for the maintenance of renal T-ICs**

(a) Left: qRT-PCR analysis of lncARSR expression in lncARSR-knockdown and control RCC cells ( $n = 3$ ). Right: qRT-PCR analysis of lncARSR expression in lncARSR-knockdown and control primary RCC cells ( $n = 3$ ). Data are represented as mean  $\pm$  s.d.;  $*p < 0.05$  and  $**p < 0.01$ ; two-tailed Student's  $t$ -test. (b) Spheres formation assay of lncARSR-knockdown and control RCC cells ( $n = 3$ ). The number of primary, secondary and tertiary passaged spheres was counted after 7 days (left). Representative images of spheres are shown (right). Scale bar = 200  $\mu$ m. (c) qRT-PCR analysis of indicated mRNAs in lncARSR-knockdown and control RCC spheres ( $n = 3$ ). Data are represented as mean  $\pm$  s.d.;  $*p < 0.05$  and  $**p < 0.01$ ; two-tailed Student's  $t$ -test. (d) Subcutaneous xenograft assay of  $1 \times 10^4$  RCC cells derived from lncARSR-knockdown and control xenografts for 2 months ( $n = 4$  per group).

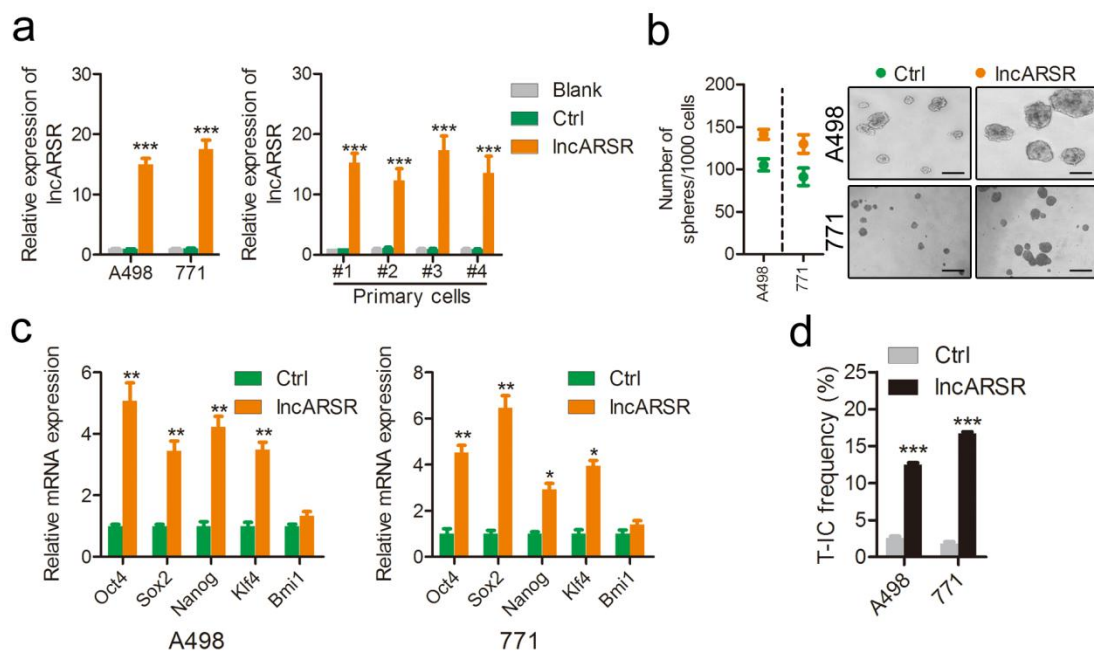

### Supplementary Figure 3. IncARSR promotes renal T-ICs expansion

(a) Left: qRT-PCR analysis of IncARSR expression in IncARSR-overexpressing and control RCC cells ( $n = 3$ ). Right: qRT-PCR analysis of IncARSR expression in IncARSR-overexpressing and control primary RCC cells ( $n = 3$ ). (b) Spheres formation assay of IncARSR-overexpressing and control RCC cells ( $n = 3$ ). The number of spheres was counted after 7 days (left). Representative images of spheres are shown (right). Scale bar = 200  $\mu\text{m}$ . (c) qRT-PCR analysis of indicated mRNAs in IncARSR-overexpressing and control RCC cells ( $n = 3$ ). (d) In vitro limiting dilution assay of IncARSR-overexpressing and control RCC cells. The results were shown as natural logarithm of the proportion of T-ICs. (a, c and d) Data are represented as mean  $\pm$  s.d.; \* $p < 0.05$ , \*\* $p < 0.01$  and \*\*\* $p < 0.001$ ; two-tailed Student's  $t$ -test.

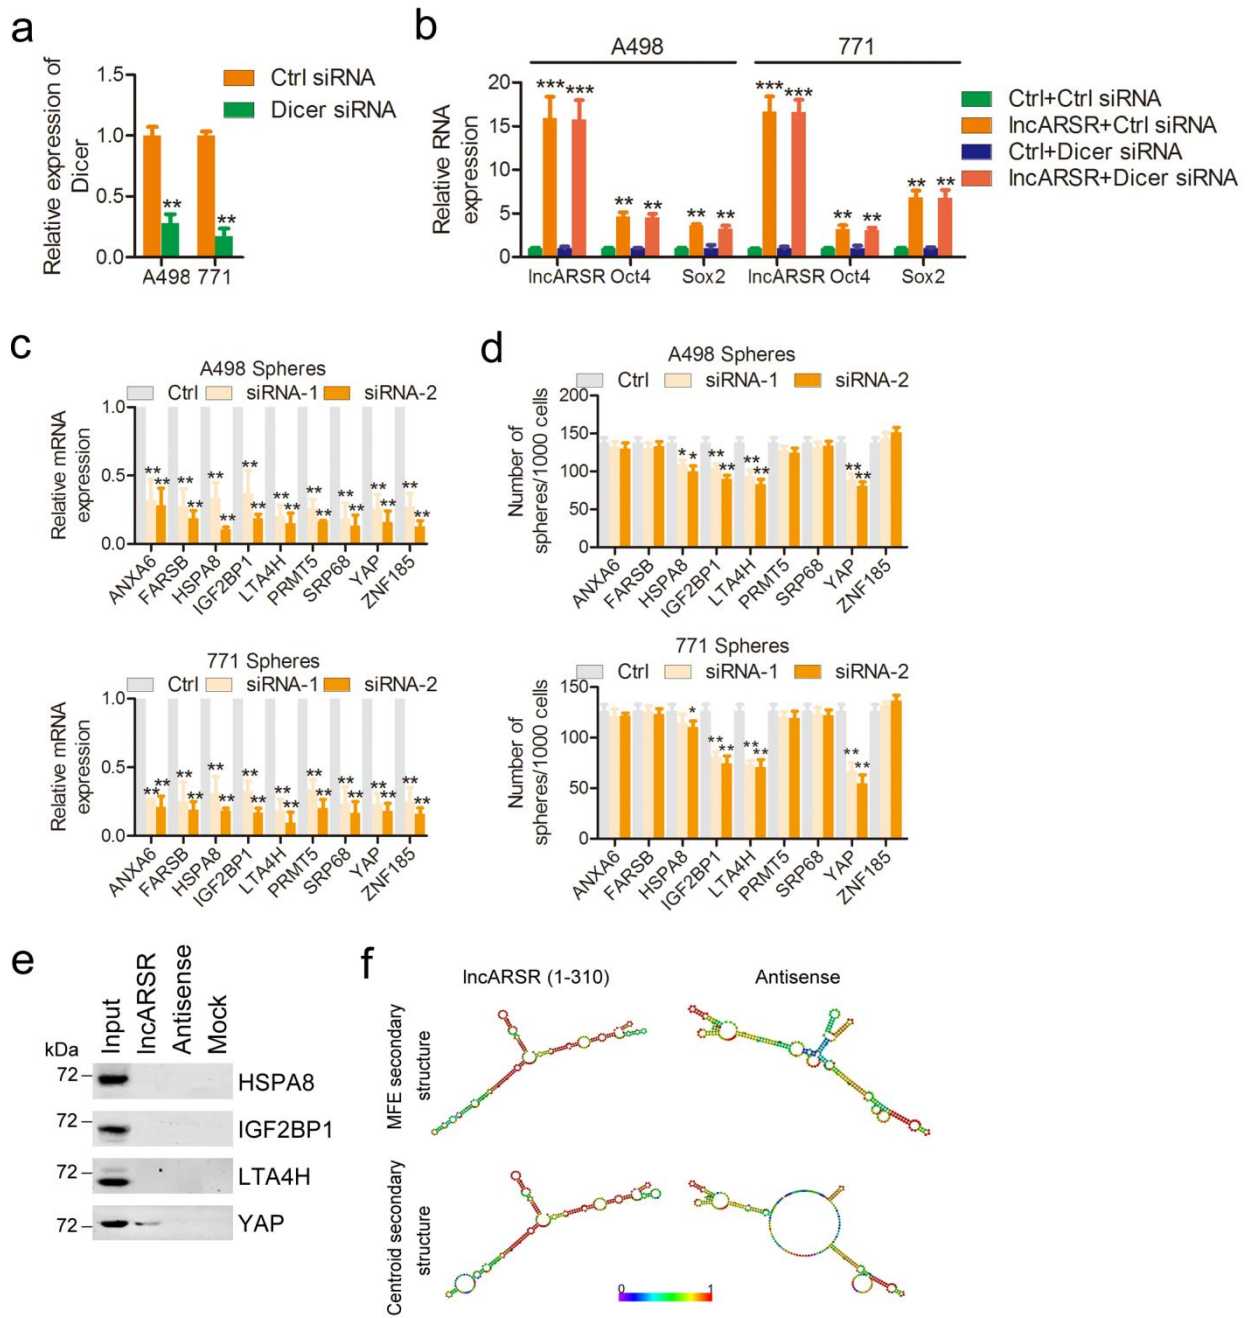

#### Supplementary Figure 4. lncARSR physically interacts with YAP

(a) qRT-PCR analysis of Dicer expression in RCC cells transfected with Dicer siRNA after 48h ( $n = 3$ ). (b) qRT-PCR analysis of indicated RNAs in RCC cells transfected with lncARSR plasmid and Dicer siRNA ( $n = 3$ ). (c) Verification of interference efficiency of siRNA for indicated mRNAs in RCC spheres by qRT-PCR ( $n = 3$ ). (d) Spheres formation assay of RCC spheres transfected with indicated siRNAs ( $n = 3$ ). The number of spheres was counted after 7 days (left). Representative images of spheres are shown (right). Scale bar = 200  $\mu\text{m}$ . (a-d) Data are represented as mean  $\pm$  s.d.; \* $p < 0.05$ , \*\* $p < 0.01$  and \*\*\* $p < 0.001$ ; two-tailed Student's  $t$ -test. (e) Western blot analysis of indicated proteins in RNA pull-down precipitates retrieved by biotin-labeled lncARSR or antisense RNA from the cytoplasmic lysates of A498 spheres. (f) Secondary structure prediction of 5' segment of lncARSR and its antisense sequence based on minimum free energy (MFE) and partition function (<http://rna.tbi.univie.ac.at/>). Color scale indicates the prediction confidence for each base with red indicating strong confidence.

Data are shown as means  $\pm$  s.d. \* $p < 0.05$ ; \*\* $p < 0.01$ ; and \*\*\* $p < 0.001$ .

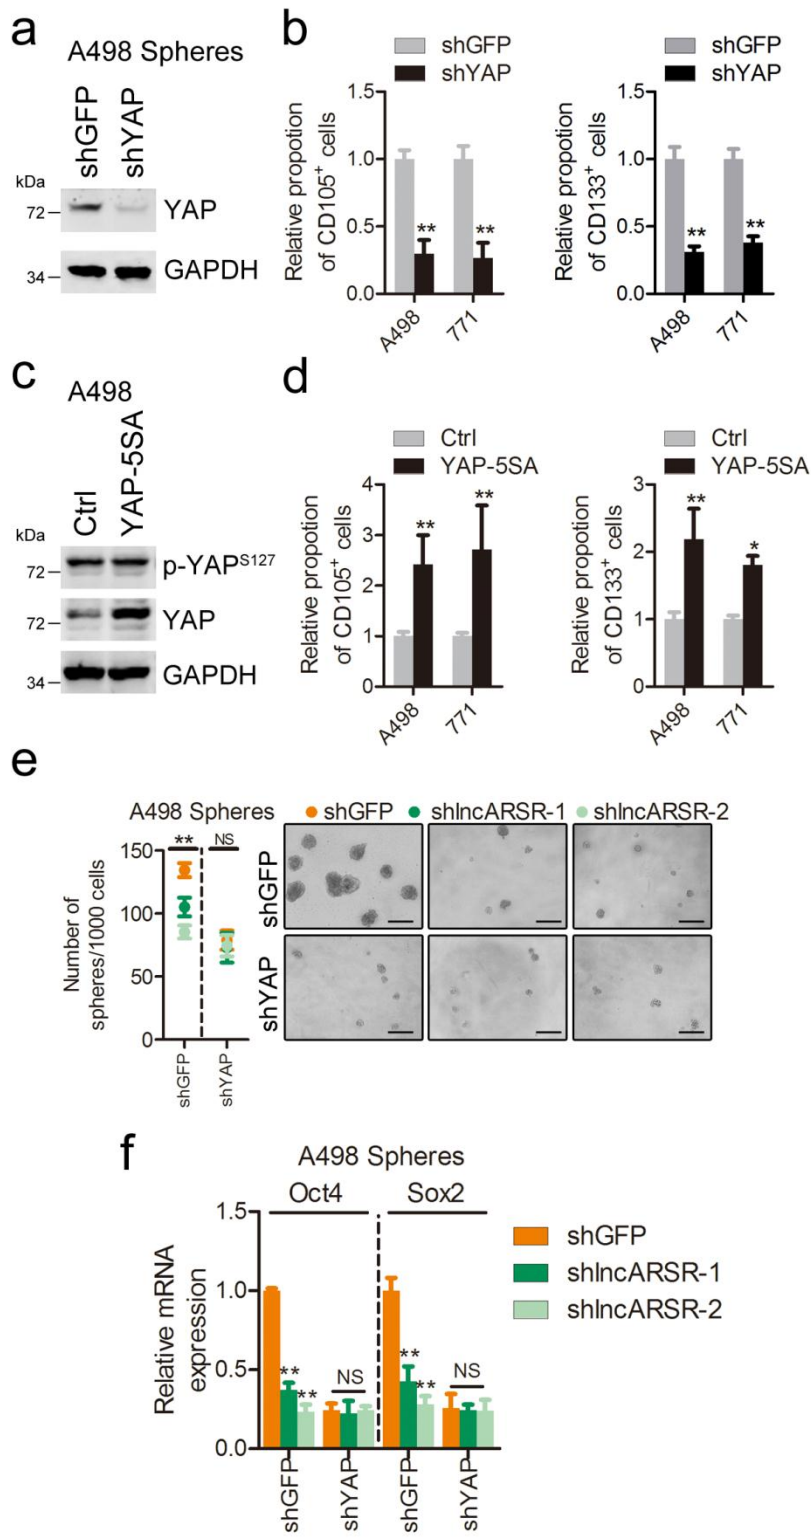



**Supplementary Figure 5. YAP is responsible for IncARSR-mediated T-IC properties**

(a) Western blot analysis of YAP in YAP-knockdown and control A498 spheres. (b) Flow cytometric analysis of the proportion of CD105+ (left) or CD133+ (right) cells in YAP-knockdown and control RCC cells ( $n = 3$ ). (c) Western blot analysis of YAP in YAP-5SA-overexpressing and control A498 cells. (d) Flow cytometric analysis of the proportion of CD105+ (left) or CD133+ (right) cells in YAP-5SA-overexpressing and control RCC cells ( $n = 3$ ). (e) Spheres formation assay of A498 spheres transfected with indicated plasmids ( $n = 3$ ). The number of spheres was counted after 7 days (left). Representative images of spheres are shown (right). Scale bar = 200  $\mu\text{m}$ . (f) qRT-PCR analysis of Oct4 and Sox2 in A498 spheres transfected with indicated plasmids after 48h ( $n = 3$ ). (b, d-f) Data are represented as mean  $\pm$  s.d.; \* $p < 0.05$  and \*\* $p < 0.01$ ; two-tailed Student's  $t$ -test.

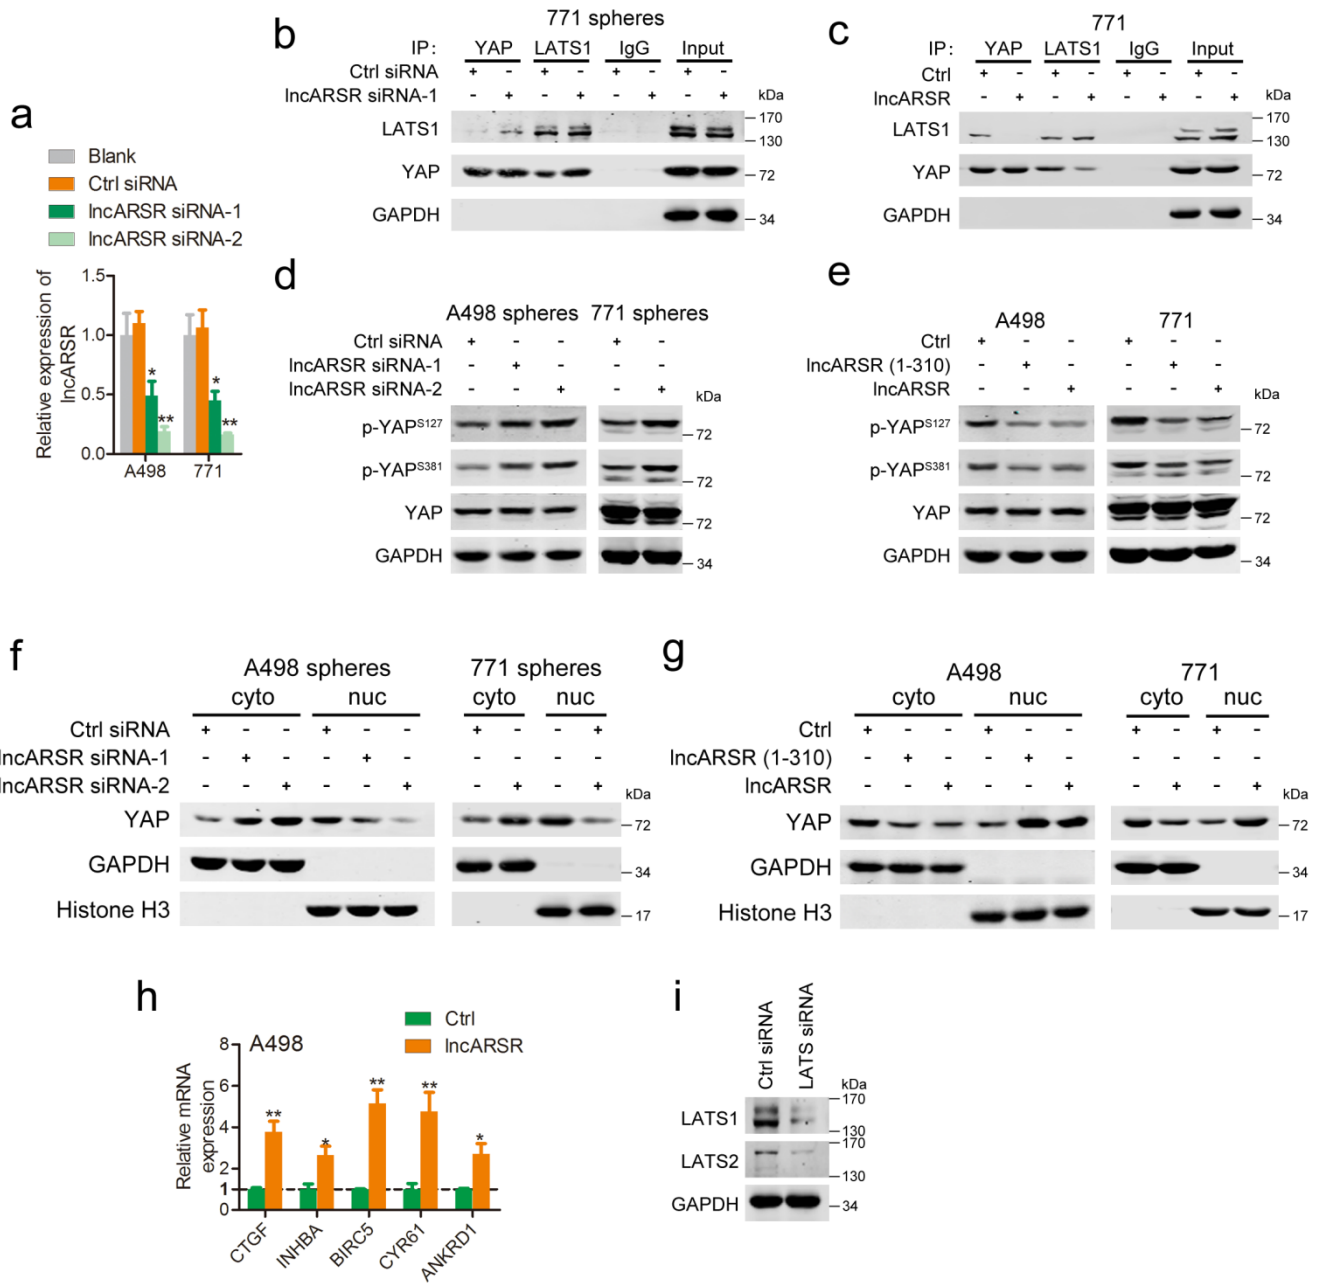

**Supplementary Figure 6. lncARSR blocks LATS1-mediated YAP phosphorylation**

(a) qRT-PCR analysis of lncARSR expression in lncARSR-knockdown and control RCC cells ( $n = 3$ ). Data are represented as mean  $\pm$  s.d.;  $*p < 0.05$  and  $**p < 0.01$ ; two-tailed Student's  $t$ -test. (b) Coimmunoprecipitation of YAP and LATS1 in lysates of lncARSR-knockdown and control 771 spheres. GAPDH acted as a loading control. (c) Coimmunoprecipitation of YAP and LATS1 in lysates of lncARSR-overexpressing and control 771 cells. GAPDH acted as a loading control. (d) Western blot analysis of YAP in lncARSR-knockdown and control RCC spheres. (e) Western blot analysis of YAP in RCC cells with lncARSR overexpression or 5' segment (nucleotides 1-310) overexpression. (f) Western blot analysis of YAP in subcellular fractions of lncARSR-knockdown and control RCC spheres. GAPDH and Histone H3 acted as cytoplasm and nucleus marker respectively. (g) Western blot analysis of YAP in subcellular fractions of RCC cells with lncARSR overexpression or 5' segment (nucleotides 1-310) overexpression. GAPDH and Histone H3 acted as cytoplasm and nucleus marker respectively. (h) qRT-PCR analysis of indicated mRNAs in lncARSR-overexpressing and control A498 cells ( $n = 3$ ). Data are represented as mean  $\pm$  s.d.;  $*p < 0.05$  and  $**p < 0.01$ ; two-tailed Student's  $t$ -test. (i) Western blot analysis of LATS1 and LATS2 in A498 cells transfected with LATS siRNA mix after 48h.

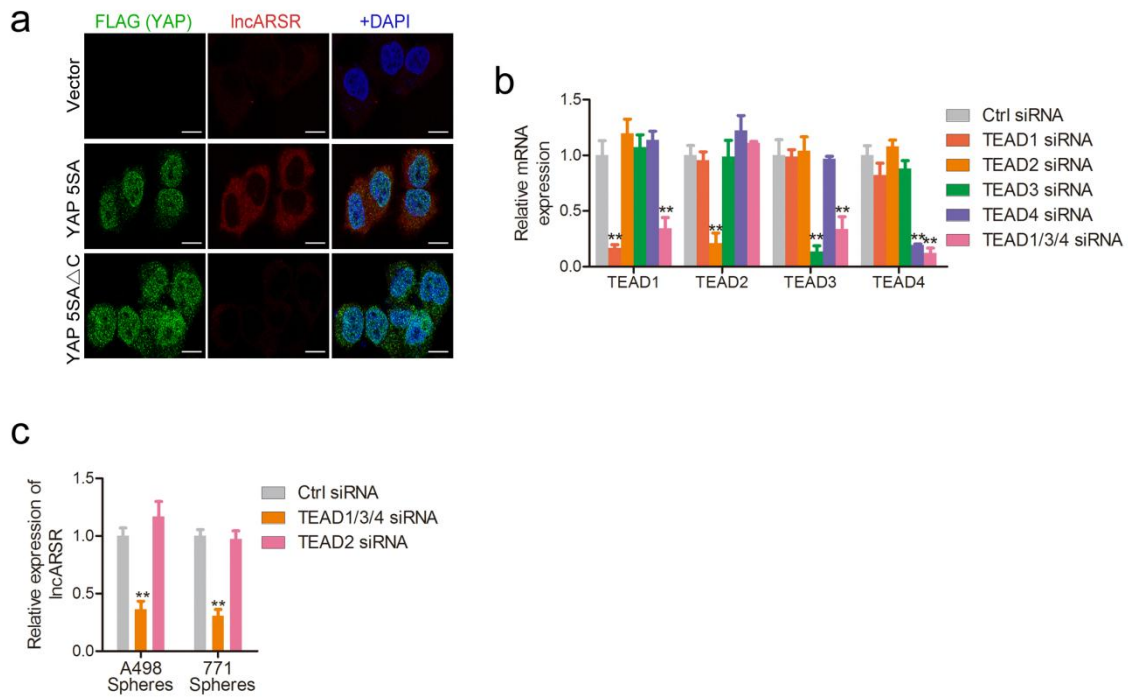

### Supplementary Figure 7. YAP/TEAD complex transactivates IncARSR

(a) RNA FISH analysis of IncARSR and immunofluorescence detection of YAP in A498 cells transfected with Flag-YAP-5SA plasmid or Flag-YAP-5SA $\Delta$ C plasmid after 48h. Scale bars = 10  $\mu$ m. (b) Verification of interference efficiency of TEADs siRNA for indicated mRNAs in RCC spheres by qRT-PCR ( $n = 3$ ). (c) qRT-PCR analysis of IncARSR in RCC spheres transfected with indicated siRNA after 48h ( $n = 3$ ). (b and c) Data are represented as mean  $\pm$  s.d.; \*\* $p < 0.01$ ; two-tailed Student's  $t$ -test.

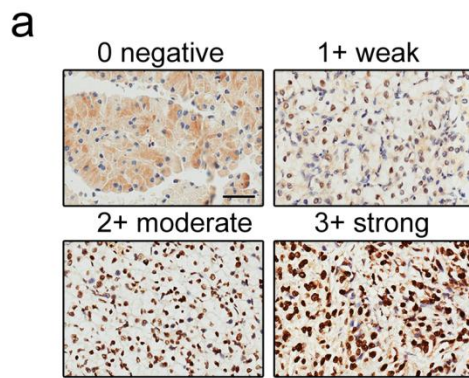

**Supplementary Figure 8. Combining IncARSR and YAP exhibits improved prognostic value**

(a) Representative images of different nuclear YAP staining intensity in RCC tissues in Cohort 2. Scale bar = 50  $\mu$ m.

**Supplementary Table 1. Clinical Characteristics of RCC Patients**

| <b>Variables</b>              | <b>Cohort 1<br/>(n = 105)</b> | <b>Cohort 2<br/>(n = 205)</b> |
|-------------------------------|-------------------------------|-------------------------------|
| <b>Gender (%)</b>             |                               |                               |
| Male                          | 65 (61.9)                     | 139 (67.8)                    |
| Female                        | 40 (38.1)                     | 66 (32.2)                     |
| <b>Age (%)</b>                |                               |                               |
| ≤60                           | 69 (65.7)                     | 133 (64.9)                    |
| >60                           | 36 (34.3)                     | 72 (35.1)                     |
| <b>Tumor size (%)</b>         |                               |                               |
| ≤4 cm                         | 45 (42.9)                     | 86 (41.9)                     |
| >4 cm                         | 60 (57.1)                     | 119 (58.1)                    |
| <b>Furman grade (%)</b>       |                               |                               |
| I and II                      | 60 (57.1)                     | 155 (75.6)                    |
| III and IV                    | 45 (42.9)                     | 50 (24.4)                     |
| <b>TNM stage (%)</b>          |                               |                               |
| I and II                      | 62 (87.6)                     | 142 (69.3)                    |
| III and IV                    | 43 (12.4)                     | 63 (30.7)                     |
| <b>Tumor thrombus (%)</b>     |                               |                               |
| No                            | 95 (90.5)                     | 186 (90.7)                    |
| Yes                           | 10 (9.5)                      | 19 (9.3)                      |
| <b>Distant metastasis (%)</b> |                               |                               |
| No                            | 92 (87.6)                     | 173 (84.4)                    |
| Yes                           | 13 (12.4)                     | 32 (15.6)                     |

**Supplementary Table 2. Correlation of lncARSR Levels and Clinical Characteristics in Cohort 1**

| <b>Variables</b>          | <b>Low lncARSR (<i>n</i> = 53)</b> | <b>High lncARSR (<i>n</i> = 52)</b> | <b><i>p</i>-value</b> |
|---------------------------|------------------------------------|-------------------------------------|-----------------------|
| <b>Gender</b>             |                                    |                                     | 1.000                 |
| Male                      | 30                                 | 30                                  |                       |
| Female                    | 23                                 | 22                                  |                       |
| <b>Age</b>                |                                    |                                     | 0.838                 |
| ≤60                       | 34                                 | 35                                  |                       |
| >60                       | 19                                 | 17                                  |                       |
| <b>Tumor size</b>         |                                    |                                     | 0.238                 |
| ≤4cm                      | 26                                 | 19                                  |                       |
| >4cm                      | 27                                 | 33                                  |                       |
| <b>Furman grade</b>       |                                    |                                     | 0.031                 |
| I / II                    | 36                                 | 24                                  |                       |
| III/VI                    | 17                                 | 28                                  |                       |
| <b>TNM stage</b>          |                                    |                                     | 0.010                 |
| I / II                    | 38                                 | 24                                  |                       |
| III/VI                    | 15                                 | 28                                  |                       |
| <b>Tumor thrombus</b>     |                                    |                                     | 0.052                 |
| No                        | 51                                 | 44                                  |                       |
| Yes                       | 2                                  | 8                                   |                       |
| <b>Distant metastasis</b> |                                    |                                     | 0.042                 |
| No                        | 50                                 | 42                                  |                       |
| Yes                       | 3                                  | 10                                  |                       |

**Supplementary Table 3. Correlation of lncARSR Levels and Clinical Characteristics in Cohort 2**

| <b>Variables</b>          | <b>Low lncARSR (<i>n</i> = 103)</b> | <b>High lncARSR (<i>n</i> = 102)</b> | <b><i>p</i>-value</b> |
|---------------------------|-------------------------------------|--------------------------------------|-----------------------|
| <b>Gender</b>             |                                     |                                      | 0.296                 |
| Male                      | 66                                  | 73                                   |                       |
| Female                    | 37                                  | 29                                   |                       |
| <b>Age</b>                |                                     |                                      | 0.661                 |
| ≤60                       | 65                                  | 68                                   |                       |
| >60                       | 38                                  | 34                                   |                       |
| <b>Tumor size</b>         |                                     |                                      | 0.888                 |
| ≤4cm                      | 44                                  | 42                                   |                       |
| >4cm                      | 59                                  | 60                                   |                       |
| <b>Furman grade</b>       |                                     |                                      | 0.023                 |
| I / II                    | 85                                  | 70                                   |                       |
| III/VI                    | 18                                  | 32                                   |                       |
| <b>TNM stage</b>          |                                     |                                      | 0.010                 |
| I / II                    | 80                                  | 62                                   |                       |
| III/VI                    | 23                                  | 40                                   |                       |
| <b>Tumor thrombus</b>     |                                     |                                      | 0.008                 |
| No                        | 99                                  | 87                                   |                       |
| Yes                       | 4                                   | 15                                   |                       |
| <b>Distant metastasis</b> |                                     |                                      | 0.002                 |
| No                        | 95                                  | 78                                   |                       |
| Yes                       | 8                                   | 24                                   |                       |

**Supplementary Table 4. Univariate and Multivariate Analyses of Factors Associated with Overall Survival in Cohort 1**

| Variable                  | Univariate | Multivariate |             |         |
|---------------------------|------------|--------------|-------------|---------|
|                           |            | Hazard Ratio | 95% CI      | p-value |
| <b>IncARSR expression</b> |            |              |             |         |
| High vs Low               | 0.004      | 3.215        | 1.269-8.145 | 0.014*  |
| <b>Furman grade</b>       |            |              |             |         |
| III/VI vs I / II          | 0.040      | 1.236        | 0.489-3.125 | 0.655   |
| <b>TNM</b>                |            |              |             |         |
| III/VI vs I / II          | 0.006      | 2.015        | 0.771-5.265 | 0.153   |
| <b>Tumor thrombus</b>     |            |              |             |         |
| Yes vs No                 | 0.047      | 1.222        | 0.419-3.565 | 0.713   |
| <b>Distant metastasis</b> |            |              |             |         |
| Yes vs No                 | 0.003      | 2.052        | 0.756-5.570 | 0.158   |

**Supplementary Table 5. Univariate and Multivariate Analyses of Factors Associated with Recurrence in Cohort 1**

| Variable                  | Univariate | Multivariate |             |         |
|---------------------------|------------|--------------|-------------|---------|
|                           |            | Hazard Ratio | 95% CI      | p-value |
| <b>IncARSR expression</b> |            |              |             |         |
| High vs Low               | 0.001      | 3.073        | 1.476-6.400 | 0.003*  |
| <b>TNM</b>                |            |              |             |         |
| III/VI vs I / II          | 0.043      | 1.242        | 0.574-2.688 | 0.583   |
| <b>Distant metastasis</b> |            |              |             |         |
| Yes vs No                 | 0.003      | 2.736        | 1.279-5.851 | 0.009*  |



**Supplementary Table 6. Univariate and Multivariate Analyses of Factors Associated with Overall Survival in Cohort 2**

| Variable                  | Univariate | Multivariate |             |                 |
|---------------------------|------------|--------------|-------------|-----------------|
|                           |            | Hazard Ratio | 95% CI      | <i>p</i> -value |
| <b>IncARSR expression</b> |            |              |             |                 |
| High vs Low               | 0.008      | 2.173        | 1.230-3.837 | 0.007*          |
| <b>TNM</b>                |            |              |             |                 |
| III/VI vs I / II          | 0.009      | 2.186        | 1.079-4.428 | 0.030*          |
| <b>Distant metastasis</b> |            |              |             |                 |
| Yes vs No                 | 0.005      | 2.451        | 1.187-5.061 | 0.015*          |

**Supplementary Table 7. Univariate and Multivariate Analyses of Factors Associated with Recurrence in Cohort 2**

| Variable                  | Univariate | Multivariate |             |                 |
|---------------------------|------------|--------------|-------------|-----------------|
|                           |            | Hazard Ratio | 95% CI      | <i>p</i> -value |
| <b>IncARSR expression</b> |            |              |             |                 |
| High vs Low               | 0.002      | 2.023        | 1.213-3.375 | 0.007*          |
| <b>TNM</b>                |            |              |             |                 |
| III/VI vs I / II          | 0.048      | 1.751        | 0.911-3.369 | 0.093           |
| <b>Tumor thrombus</b>     |            |              |             |                 |
| Yes vs No                 | 0.138      | 0.992        | 0.510-1.932 | 0.982           |
| <b>Distant metastasis</b> |            |              |             |                 |
| Yes vs No                 | 0.004      | 2.793        | 1.393-5.597 | 0.004*          |

**Supplementary Table 8. Frequency of T-ICs in lncARSR-knockdown and control sphere-derived RCC cells**

| Cell type inoculated | T-ICs Frequency |                        | <i>p</i> -value |
|----------------------|-----------------|------------------------|-----------------|
|                      | Estimate        | Upper and Lower Limits |                 |
| <b>A498 Sphere</b>   |                 |                        |                 |
| shGFP                | 1/3181          | 1/8043-1/1258          |                 |
| shlncARSR-1          | 1/38490         | 1/94240-1/15720        | <0.0001         |
| shlncARSR-2          | 1/84598         | 1/214144-1/33421       | <0.0001         |
| <b>771 Sphere</b>    |                 |                        |                 |
| shGFP                | 1/7908          | 1/19790-1/3160         |                 |
| shlncARSR-1          | 1/84598         | 1/214144-1/33421       | 0.0002          |
| shlncARSR-2          | 1/280334        | 1/1115137-1/70473      | <0.0001         |

**Supplementary Table 9. Frequency of T-ICs in lncARSR-overexpressing and control RCC cells**

| Cell type inoculated | T-ICs Frequency |                        | <i>p</i> -value |
|----------------------|-----------------|------------------------|-----------------|
|                      | Estimate        | Upper and Lower Limits |                 |
| <b>A498</b>          |                 |                        |                 |
| Ctrl                 | 1/460139        | 1/1110523-1/190656     |                 |
| lncARSR              | 1/57086         | 1/138002-1/23614       | 0.0007          |
| <b>771</b>           |                 |                        |                 |
| Ctrl                 | 1/1228510       | 1/3410211-1/442564     |                 |
| lncARSR              | 1/122257        | 1/333981-1/44753       | 0.0009          |

**Supplementary Table 10. Frequency of T-ICs in indicated RCC cells**

| Cell type inoculated | T-ICs Frequency |                        | <i>p</i> -value |
|----------------------|-----------------|------------------------|-----------------|
|                      | Estimate        | Upper and Lower Limits |                 |
| <b>A498</b>          |                 |                        |                 |
| Ctrl shGFP           | 1/376880        | 1/925194-1/153523      |                 |
| lncARSR shGFP        | 1/31801         | 1/80421-1/12575        | <0.0001         |
| Ctrl shYAP           | 1/681902        | 1/1670761-1/278311     | 0.318           |
| lncARSR shYAP        | 1/384893        | 1/942399-1/157197      | 0.971           |

**Supplementary Table 11. Correlation of Nuclear YAP and lncARSR Levels in Cohort 2**

|                 | Low lncARSR | High lncARSR | <i>p</i> -value  |
|-----------------|-------------|--------------|------------------|
| <b>cyto-YAP</b> | 79          | 38           | <i>p</i> < 0.001 |
| <b>nuc-YAP</b>  | 24          | 64           |                  |

**Supplementary Table 12. Sequences of Primers Used for Plasmid Construction**

|                                    |                      |                                                                             |
|------------------------------------|----------------------|-----------------------------------------------------------------------------|
| pcDNA3.1<br>-lncARSR               | Forward<br>(5'-3')   | GGGGTACCACCCCGGAGGCACTCG                                                    |
|                                    | Reverse<br>(5'-3')   | CCGCTCGAGTTTTTTTTTTGTTTTATCAA<br>GGAATTA                                    |
| pSPT19<br>-lncARSR                 | Forward<br>(5'-3')   | GCTCTAGAACCCCGGAGGCACTCG                                                    |
|                                    | Reverse<br>(5'-3')   | CCCAAGCTTTTTTTTTTTGTTTTATCAAAG<br>GAATTA                                    |
| pSPT19<br>-lncARS R<br>-5' (1-310) | Reverse<br>(5'-3')   | CCGCTCGAG<br>TGAGACCAGCCAGTTGAGTTGG                                         |
| pSPT19<br>-lncARSR<br>-3'(282-591) | Forward<br>(5'-3')   | GCCC AAGCTT<br>CTATACCCCAACTCAACTGGCTGG                                     |
| shlncARSR-1                        | Sense<br>(5'-3')     | CCGGGAGCATGAAGAACTCCA ACTTCTCG<br>AGAAGTTGGAGTTCTTCATGCTCTTTTT              |
|                                    | Antisense<br>(5'-3') | AATTAAAAAGAGCATGAAGAACTCCA ACT<br>TCTCGAGAAGTTGGAGTTCTTCATGCTC              |
| shlncARSR-2                        | Sense<br>(5'-3')     | CCGGGCATGAAGAACTCCA ACTTCACTCG<br>AGTGAAGTTGGAGTTCTTCATGCTTTTT              |
|                                    | Antisense<br>(5'-3') | AATTAAAAAGCATGAAGAACTCCA ACTTC<br>ACTCGAGTGAAGTTGGAGTTCTTCATGC              |
| shGFP                              | Sense<br>(5'-3')     | 5'-CCGGGCAAGCTGACCCTGAAGTTCATCT<br>CGAGATGA ACTTCAGGGTCAGCTTGCTTT<br>TTG-3' |
|                                    | Antisense<br>(5'-3') | 5'-AATTCAAAAAGCAAGCTGACCCTGAAG<br>TTCATCTCGAGATGA ACTTCAGGGTCAGCT<br>TGC-3' |
| YAP(1M)<br>-(EcoRI)                | Forward<br>(5'-3')   | CCGGAATTCGCCACCATGGATCCCGGGCA<br>GCAGC                                      |
| YAP(154T)<br>-(SalI)               | Reverse<br>(5'-3')   | GGACCGTCGACTGTAGCTGCTGGGCCAGA<br>GACTACTCC                                  |
| YAP(155P)<br>-(EcoRI)              | Forward<br>(5'-3')   | CCGGAATTCGCCACCATGGATCCCACAGC<br>TCAGCATCTTCGACA                            |
| YAP(504L)<br>-(SalI)               | Reverse<br>(5'-3')   | GGACCGTCGACTAACCATGTAAGAAAGCT<br>TTCTTTATCTAGCTTGG                          |
| YAP(263L)<br>-(SalI)               | Reverse<br>(5'-3')   | GGACCGTCGACAAGCCTTGGGTCTAGCCA<br>AGAGG                                      |
| YAP(264D)<br>-(EcoRI)              | Forward<br>(5'-3')   | CCGGAATTCGCCACCATGGACCCTCGTTTT<br>GCCATGAACC                                |
| YAP(287P)<br>-(SalI)               | Reverse<br>(5'-3')   | GGACCGTCGACGGGAGCCAGGGGTGGTG<br>G                                           |
| YAP(288Q)<br>-(EcoRI)              | Forward<br>(5'-3')   | CCGGAATTCGCCACCATGGATCAGAGCCC<br>ACAGGGAGGCG                                |
| YAP(499S)<br>-(SalI)               | Reverse<br>(5'-3')   | GGACCGTCGACGCTTTCTTTATCTAGCTTG<br>GTGGCAGCC                                 |

**Supplementary Table 13. Sequences of siRNA Used in This Study**

|                 |                   |                        |
|-----------------|-------------------|------------------------|
| lncARSR siRNA   | Sense (5'-3')     | CAACCCUGGAUCCAAAGUATT  |
|                 | Antisense (5'-3') | UACUUUGGAUCCAGGGUUGTT  |
| YAP siRNA-1     | Sense (5'-3')     | GGUGAUACUAUCAACCAAATT  |
|                 | Antisense (5'-3') | UUUGGUUGAUAGUAUCACCTT  |
| YAP siRNA-2     | Sense (5'-3')     | CUGCCACCAAGCUAGAUAAATT |
|                 | Antisense (5'-3') | UUAUCUAGCUUGGUGGCAGTT  |
| TEAD1 siRNA     | Sense (5'-3')     | CUGCCAUUCUAUACAAGCUTT  |
|                 | Antisense (5'-3') | AGCUUGUUAUGAAUGGCAGTT  |
| TEAD2 siRNA     | Sense (5'-3')     | GCCAGAUGCAGUUGAUUCUTT  |
|                 | Antisense (5'-3') | AGAAUCAACUGCAUCUGGCTT  |
| TEAD3 siRNA     | Sense (5'-3')     | CCAGUGUCCUGCAGAACAATT  |
|                 | Antisense (5'-3') | UUGUUCUGCAGGACACUGGTT  |
| TEAD4 siRNA     | Sense (5'-3')     | GAACGUCCCAUGAUGUGAATT  |
|                 | Antisense (5'-3') | UUCACAUCAUGGGACGUUCTT  |
| TEAD1/3/4 siRNA | Sense (5'-3')     | UGAUCAACUUCAUCCACAATT  |
|                 | Antisense (5'-3') | UUGUGGAUGAAGUUGAUCATT  |
| LATS1 siRNA     | Sense (5'-3')     | GCAGCGUCUACAUCGUAAATT  |
|                 | Antisense (5'-3') | UUUACGAUGUAGACGCUGCTT  |
| LATS2 siRNA     | Sense (5'-3')     | CUACCAGAAAGAGUCUAAUTT  |
|                 | Antisense (5'-3') | AUUAGACUCUUUCUGGUAGTT  |
| Dicer siRNA     | Sense (5'-3')     | GGGCACCAUCUCUAAUUATT   |
|                 | Antisense (5'-3') | UAAUUAGAGAUGGGUGCCCTT  |
| ANXA6 siRNA-1   | Sense (5'-3')     | GGGACUUUGAGAAGCUAAUTT  |
|                 | Antisense (5'-3') | AUUAGCUUCUCAAGUCCCTT   |
| ANXA6 siRNA-2   | Sense (5'-3')     | CUCGGACCAAUGCUGAAAUTT  |
|                 | Antisense (5'-3') | AUUUCAGCAUUGGUCCGAGTT  |
| FARSB siRNA-1   | Sense (5'-3')     | CACCUACACUGACGAAGAATT  |
|                 | Antisense (5'-3') | UUCUUCGUCAGUGUAGGUGTT  |
| FARSB siRNA-2   | Sense (5'-3')     | CCUGUAUCCAGUUAUCUAUTT  |
|                 | Antisense (5'-3') | AUAGAUAACUGGAUACAGGTT  |
| HSPA8 siRNA-1   | Sense (5'-3')     | GUCCUCAUCAAGCGUAAUATT  |
|                 | Antisense (5'-3') | UAUUACGCUUGAUGAGGACTT  |
| HSPA8 siRNA-2   | Sense (5'-3')     | GCUGGUCUCAUUGUACUUATT  |
|                 | Antisense (5'-3') | UAAGUACAUUGAGACCAGCTT  |
| IGF2BP1 siRNA-1 | Sense (5'-3')     | GGCCCAUAAUAACUUUGUATT  |
|                 | Antisense (5'-3') | UACAAAGUUUUUUGGGCCTT   |
| IGF2BP1 siRNA-2 | Sense (5'-3')     | GCUCCCUAUAGCUCCUUUATT  |
|                 | Antisense (5'-3') | UAAAGGAGCUAUAGGGAGCTT  |
| LTA4H siRNA-1   | Sense (5'-3')     | CAAAGGACCUUACAUAUAGATT |
|                 | Antisense (5'-3') | UCUAUUGUAAGGUCCUUUGTT  |
| LTA4H siRNA-2   | Sense (5'-3')     | CAUGAAAUAUCUCAUAGCUTT  |
|                 | Antisense (5'-3') | AGCUAUGAGAUUUUCAUGTT   |
| PRMT5 siRNA-1   | Sense (5'-3')     | CCGGACUUUGUGUGACUAUTT  |
|                 | Antisense (5'-3') | AUAGUCACACAAAGUCCGTT   |
| PRMT5 siRNA-2   | Sense (5'-3')     | GGUGAACACAGUACUACAUTT  |
|                 | Antisense (5'-3') | AUGUAGUACUGUGUUCACCTT  |
| SRP68 siRNA-1   | Sense (5'-3')     | GAGCUUCUGACCGAUAAUATT  |
|                 | Antisense (5'-3') | UAUUUUCGGUCAGAAGCUCTT  |
| SRP68 siRNA-2   | Sense (5'-3')     | CAGCUACCAUGAGUGAAGUTT  |
|                 | Antisense (5'-3') | ACUUCACUCAUGGUAGCUGTT  |
| ZNF185 siRNA-1  | Sense (5'-3')     | CCACUGAGGAUUACAAGAATT  |
|                 | Antisense (5'-3') | UUCUUGUAAUCCUCAGUGGTT  |
| ZNF185 siRNA-2  | Sense (5'-3')     | CAACUUGUCAGACGAGAGATT  |
|                 | Antisense (5'-3') | UCUCUCGUCUGACAAGUUGTT  |
| Ctrl siRNA      | Sense (5'-3')     | UUCUCCGAACGUGUCACGUTT  |
|                 | Antisense (5'-3') | ACGUGACACGUUCGGAGAATT  |

**Supplementary Table 14. Sequences of Primers Used for qRT-PCR in This Study**

|                |                |                               |
|----------------|----------------|-------------------------------|
| IncARSR        | Forward(5'-3') | TTTGAAATGCTCTTTGAGGGAT        |
|                | Reverse(5'-3') | TGCAGGTTGTCTGAAGTTGGA         |
| Oct4           | Forward(5'-3') | CTTGCTGCAGAAGTGGGTGGAGGAA     |
|                | Reverse(5'-3') | CTGCAGTGTGGGTTTCGGGCA         |
| Sox2           | Forward(5'-3') | AAATGGGAGGGGTGCAAAAGAGGAG     |
|                | Reverse(5'-3') | CAGCTGTCAATTTGCTGTGGGTGATG    |
| Nanog          | Forward(5'-3') | AATACCTCAGCCTCCAGCAGATG       |
|                | Reverse(5'-3') | TGCGTCACACCATTGCTATTCTTC      |
| Klf4           | Forward(5'-3') | GCCCCTCGGGCGGCTTCGTGGCCGAGCTC |
|                | Reverse(5'-3') | CGTACTCGCTGCCAGGGGCG          |
| c-Myc          | Forward(5'-3') | CATCATCATCCAGGACTGTATGTG      |
|                | Reverse(5'-3') | GGCTGCCGCTGTCTTTGC            |
| CD105          | Forward(5'-3') | CACTAGCCAGGTCTCGAAGG          |
|                | Reverse(5'-3') | CTGAGGACCAGAAGCACCTC          |
| CD133          | Forward(5'-3') | GCAGCAGTCTGACCAGCGTGAA        |
|                | Reverse(5'-3') | ACGGGTGGAAGCTGCCTCAGTT        |
| YAP            | Forward(5'-3') | AGCCCAAATCCCCTCCC             |
|                | Reverse(5'-3') | GTATCTCAAAGAAGACTGTCGAAGA     |
| CTGF           | Forward(5'-3') | GCCCAAGGACCAAACCG             |
|                | Reverse(5'-3') | GTGCAGCCAGAAAGCTCAA           |
| INHBA          | Forward(5'-3') | TCGGGGAGAACGGGTATG            |
|                | Reverse(5'-3') | TGCTGGAGACAGGGAAGACA          |
| BIRC5          | Forward(5'-3') | TTCTCAAGGACCACCGCATCT         |
|                | Reverse(5'-3') | CGCACTTTCTCCGCAGTTTC          |
| CYR61          | Forward(5'-3') | AGTGCTGCGAGGAGTGGG            |
|                | Reverse(5'-3') | GGTTGTATAGGATGCGAGGCT         |
| ANKRD1         | Forward(5'-3') | GAGGAACTGGTCACTGGAAAGA        |
|                | Reverse(5'-3') | GGGTCACAGGGTGGGCTA            |
| TEAD1          | Forward(5'-3') | CATCTTATCAGACGAAGGCAAAA       |
|                | Reverse(5'-3') | AGGTCGGGCGTGGAATC             |
| TEAD2          | Forward(5'-3') | GTCTGATGAAGGCAAGATGTATGG      |
|                | Reverse(5'-3') | CAAGGTGAACGGTGTCTGTGAG        |
| TEAD3          | Forward(5'-3') | AGGACGGGGAAGACTCGG            |
|                | Reverse(5'-3') | TGGGGTAGGCTGGCTGTG            |
| TEAD4          | Forward(5'-3') | GGGGACCCTCCAATGCCT            |
|                | Reverse(5'-3') | CTCTGTCTCAACTTTCTCCACCA       |
| $\beta$ -actin | Forward(5'-3') | AATCGTGCGTGACATTAAGGAG        |
|                | Reverse(5'-3') | ACTGTGTTGGCGTACAGGTCTT        |

**Supplementary Table 15. Primary Antibodies Used in This Study**

| <b>Antigens</b>       | <b>Manufacturer</b>       | <b>Application</b>                                                                          |
|-----------------------|---------------------------|---------------------------------------------------------------------------------------------|
| Sox2                  | Abcam                     | 1:1000 for WB                                                                               |
| Oct4                  | Abcam                     | 1:1000 for WB                                                                               |
| p-YAP <sup>S127</sup> | Cell Signaling Technology | 1:1000 for WB                                                                               |
| p-YAP <sup>S381</sup> | Cell Signaling Technology | 1:1000 for WB                                                                               |
| YAP                   | Cell Signaling Technology | 1:50 for IP, 1:100 for ICC,<br>1:1000 for WB, 1:100 for IHC,<br>1:50 for RIP, 1:50 for ChIP |
| LATS1                 | Cell Signaling Technology | 1:50 for IP, 1:1000 for WB                                                                  |
| LATS2                 | Proteintech               | 1:1000 for WB                                                                               |
| TEAD1                 | Cell Signaling Technology | 1:50 for ChIP                                                                               |
| FLAG                  | Merck Millipore           | 1:50 for RIP, 1:1000 for WB,<br>1:100 for ICC, 1:50 for ChIP                                |
| MYC                   | Cell Signaling Technology | 1:50 for IP                                                                                 |
| CD105-APC             | ebioscience               | 1:50 for FACS                                                                               |
| CD133-FITC            | ebioscience               | 1:50 for FACS                                                                               |
| Histone H3            | Abcam                     | 1:1000 for WB                                                                               |
| HSPA8                 | Proteintech               | 1:1000 for WB                                                                               |
| IGF2BP1               | Proteintech               | 1:1000 for WB                                                                               |
| LTA4H                 | Proteintech               | 1:1000 for WB                                                                               |
| GAPDH                 | Abclonal                  | 1:5000 for WB                                                                               |

WB, western blot; IHC, immunohistochemistry; ICC, Immunocytochemistry; IP, immunoprecipitation; ChIP, chromatin immunoprecipitation; RIP, RNA immunoprecipitation, FACS, fluorescence activated cell sorter.

**Supplementary Table 16. Sequences of Primers Used for ChIP-qPCR in This Study**

|      |                |                           |
|------|----------------|---------------------------|
| TB 1 | Forward(5'-3') | TCACTGGGTGTCTGGTCTGC      |
|      | Reverse(5'-3') | GAGCGTTGCCTTGGGAG         |
| TB 2 | Forward(5'-3') | GGAAGAAAGCAGCCAACAACC     |
|      | Reverse(5'-3') | GACGCCTACCGCAACG          |
| Neg  | Forward(5'-3') | ATCTTACTTCGTTTCGGTTCACATC |
|      | Reverse(5'-3') | GCGACTCCATTTCTGGCTCTA     |
